# Supplementary material for: Bridging and synergistic effect of the pyrochlore like Bi2Zr2O7structure with robust CdCuS solid solution for durable photocatalytic removal of the organic pollutants
Source: Royal Society of Chemistry journal article supplement (doi:10.1039/d0ra00644k), 2020-01-01
Supplement: d0ra00644k1.pdf [file d0ra00644k1.pdf]

### Supporting information

#### **Bridging and synergistic effect of the pyrochlore like $\text{Bi}_2\text{Zr}_2\text{O}_7$ with robust CdCuS solid solution for durable photocatalytic removal of the organic pollutants**

#### **Fig and Table captions**

Fig (S1). Comparison of PXRD of the CuS, CdS and CdCuS solid solution

Fig (S2). SAED patterns of the pure of  $\text{Bi}_2\text{Zr}_2\text{O}_7$ , CuS, CdCuS and CdCuS/ $\text{Bi}_2\text{Zr}_2\text{O}_7$  nanocomposite

Fig (S3). EDS spectra of the pure of (a)  $\text{Bi}_2\text{Zr}_2\text{O}_7$ , (b) CuS, (c) CdCuS and (d) CdCuS/  $\text{Bi}_2\text{Zr}_2\text{O}_7$  nanocomposite

Fig (S4). Photocurrent measurement of the samples

Fig (S5). Photodegradation of MB dye solution by (a)  $\text{Bi}_2\text{Zr}_2\text{O}_7$ , (b) CuS, (c) CdCuS, and (d)  $\text{Bi}_2\text{Zr}_2\text{O}_7$  supported by CdCuS

Fig (S6). Photo reduction of 4-NP solution by (a)  $\text{Bi}_2\text{Zr}_2\text{O}_7$ , (b) CuS, (c) CdCuS, and (d)  $\text{Bi}_2\text{Zr}_2\text{O}_7$  supported by CdCuS

Fig (S7). Stability analysis of catalyst by XRD pattern for before and after the reaction

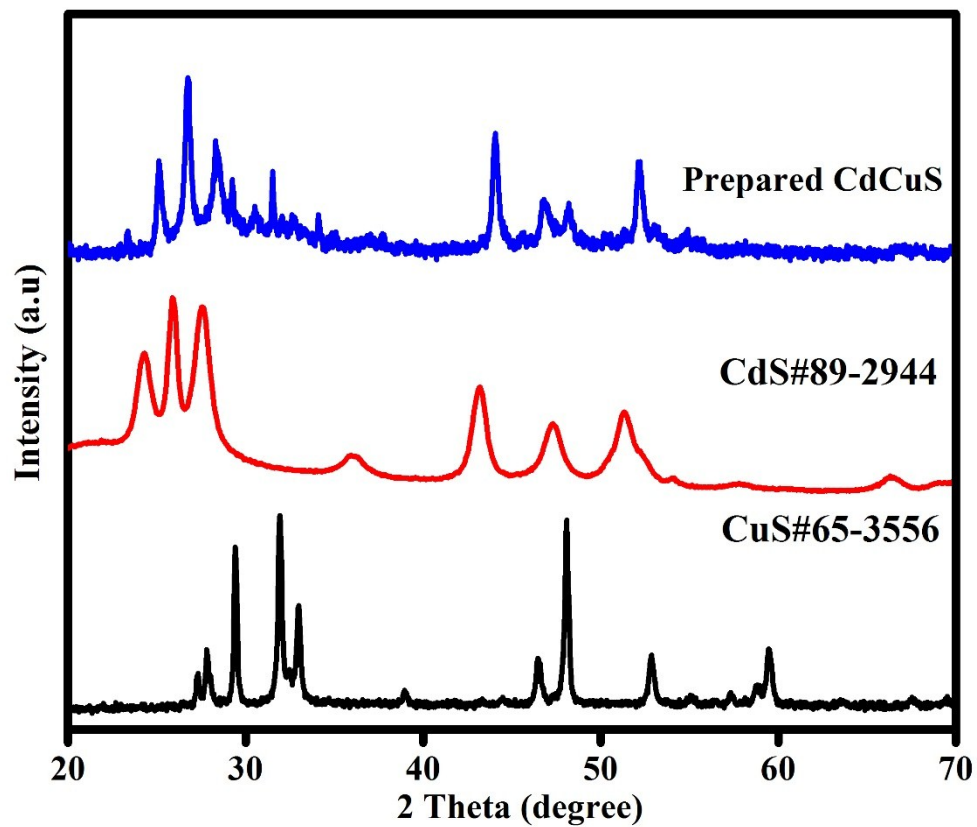

Fig (S1). Comparison of PXR of the CuS, CdS and CdCuS solid solution

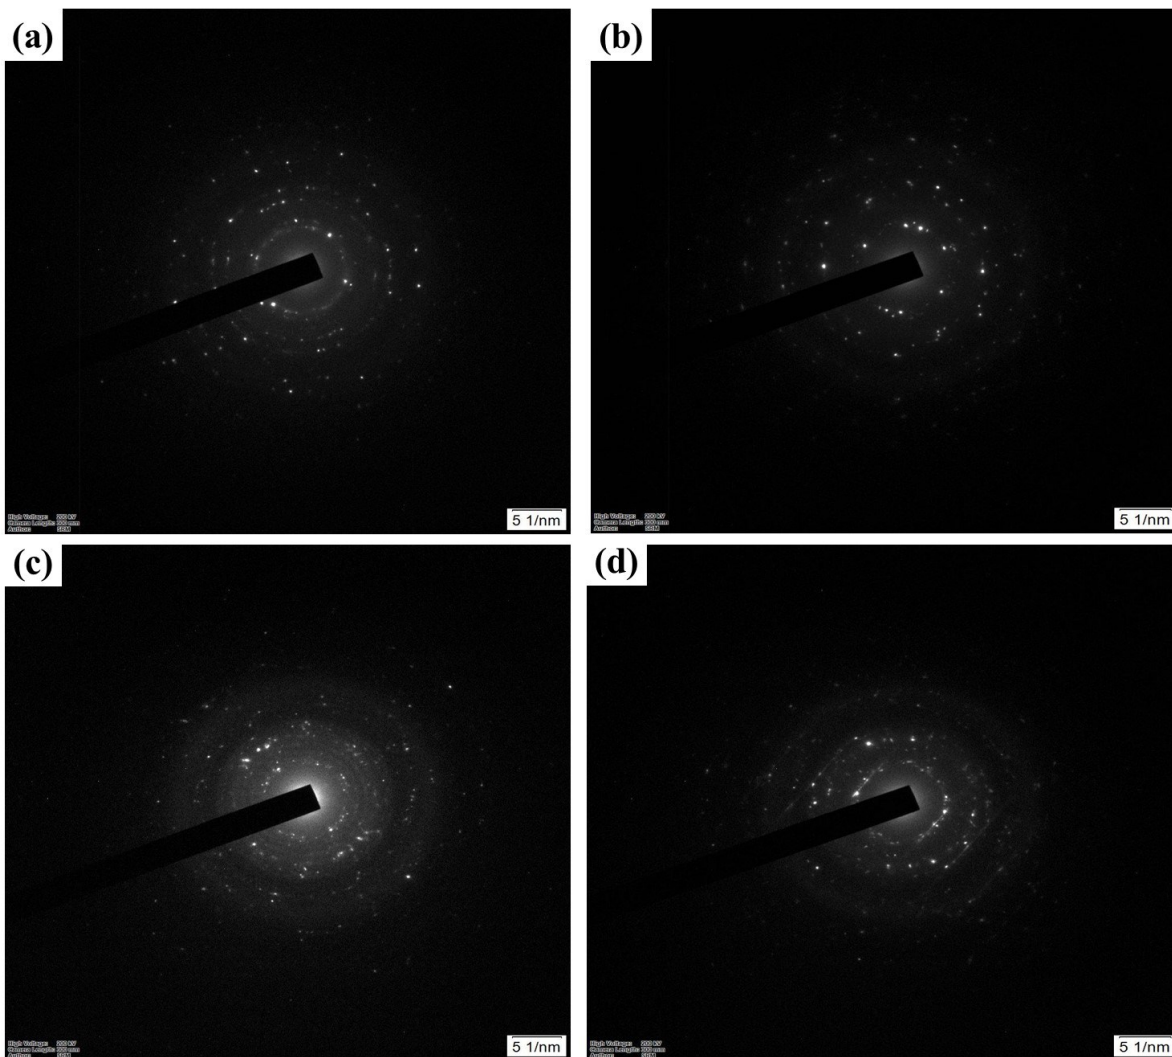

Fig (S2). SAED patterns of the pure of  $\text{Bi}_2\text{Zr}_2\text{O}_7$ ,  $\text{CuS}$ ,  $\text{CdCuS}$  and  $\text{CdCuS}/\text{Bi}_2\text{Zr}_2\text{O}_7$  nanocomposite

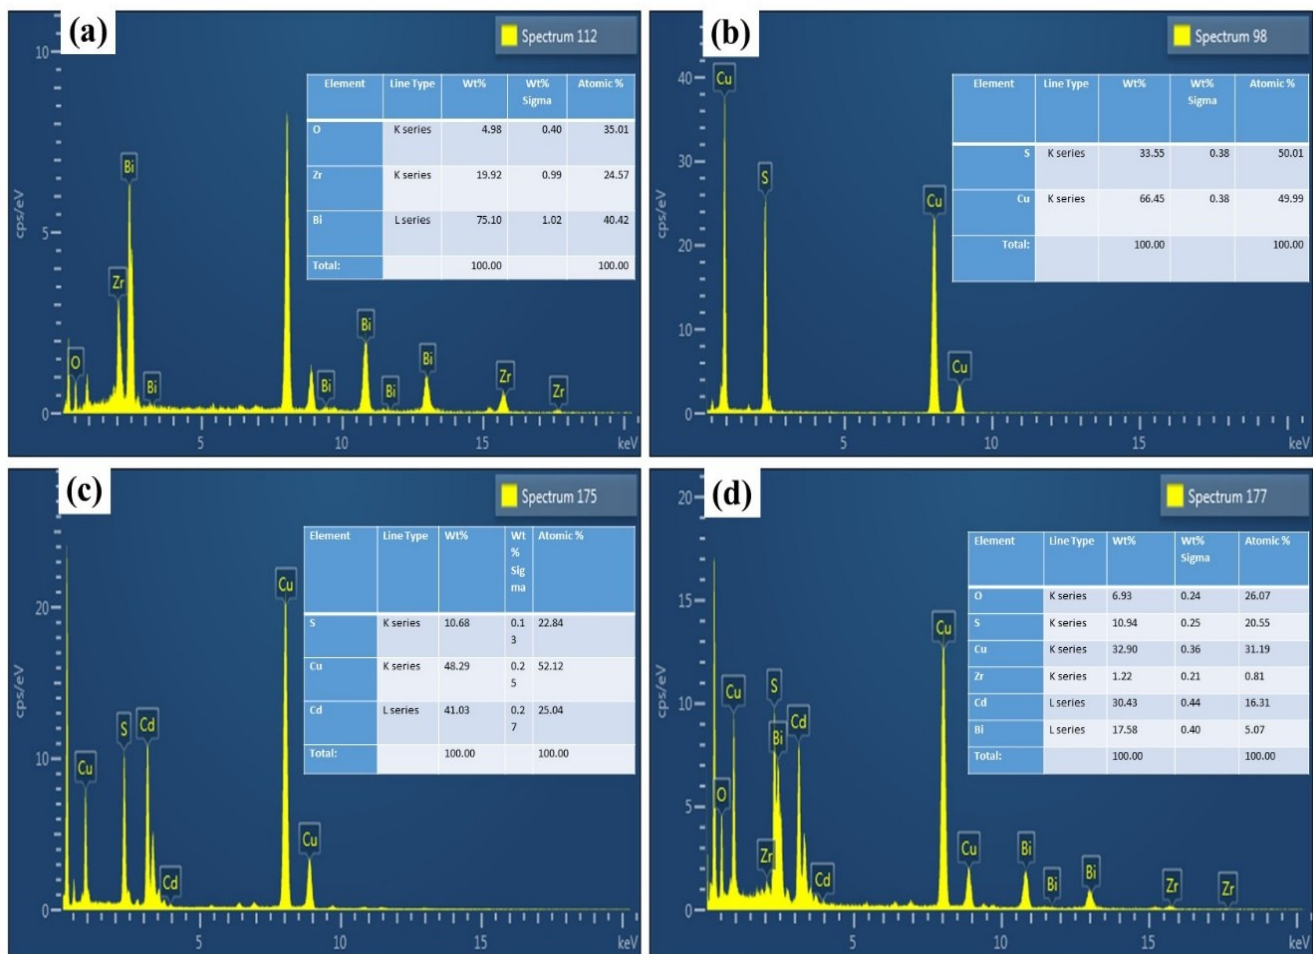

Fig (S3). EDS spectra of the pure of (a)  $\text{Bi}_2\text{Zr}_2\text{O}_7$ , (b)  $\text{CuS}$ , (c)  $\text{CdCuS}$  and (d)  $\text{CdCuS}/\text{Bi}_2\text{Zr}_2\text{O}_7$  nanocomposite

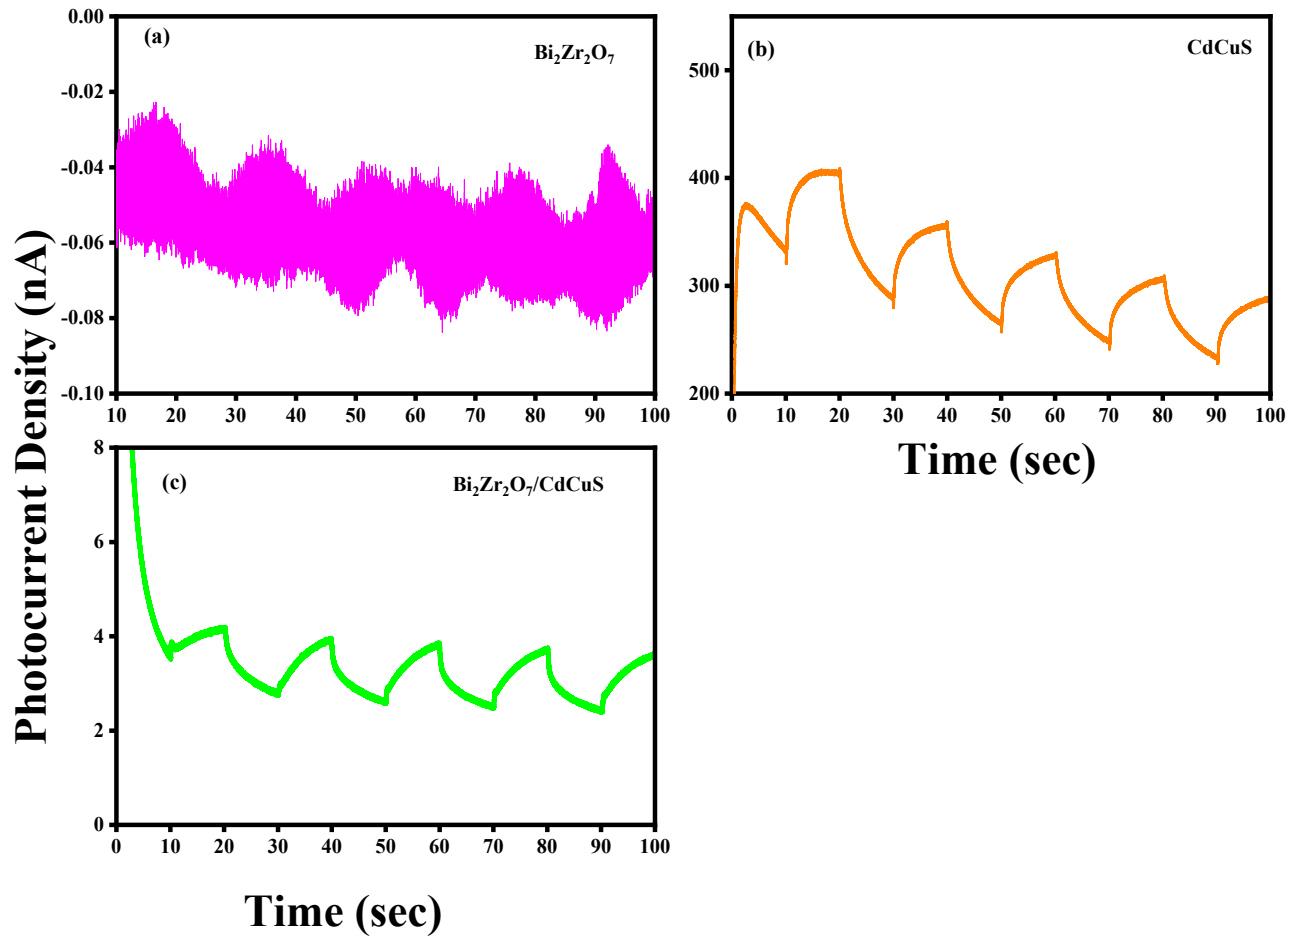

Fig (S4). Photocurrent measurement of the samples

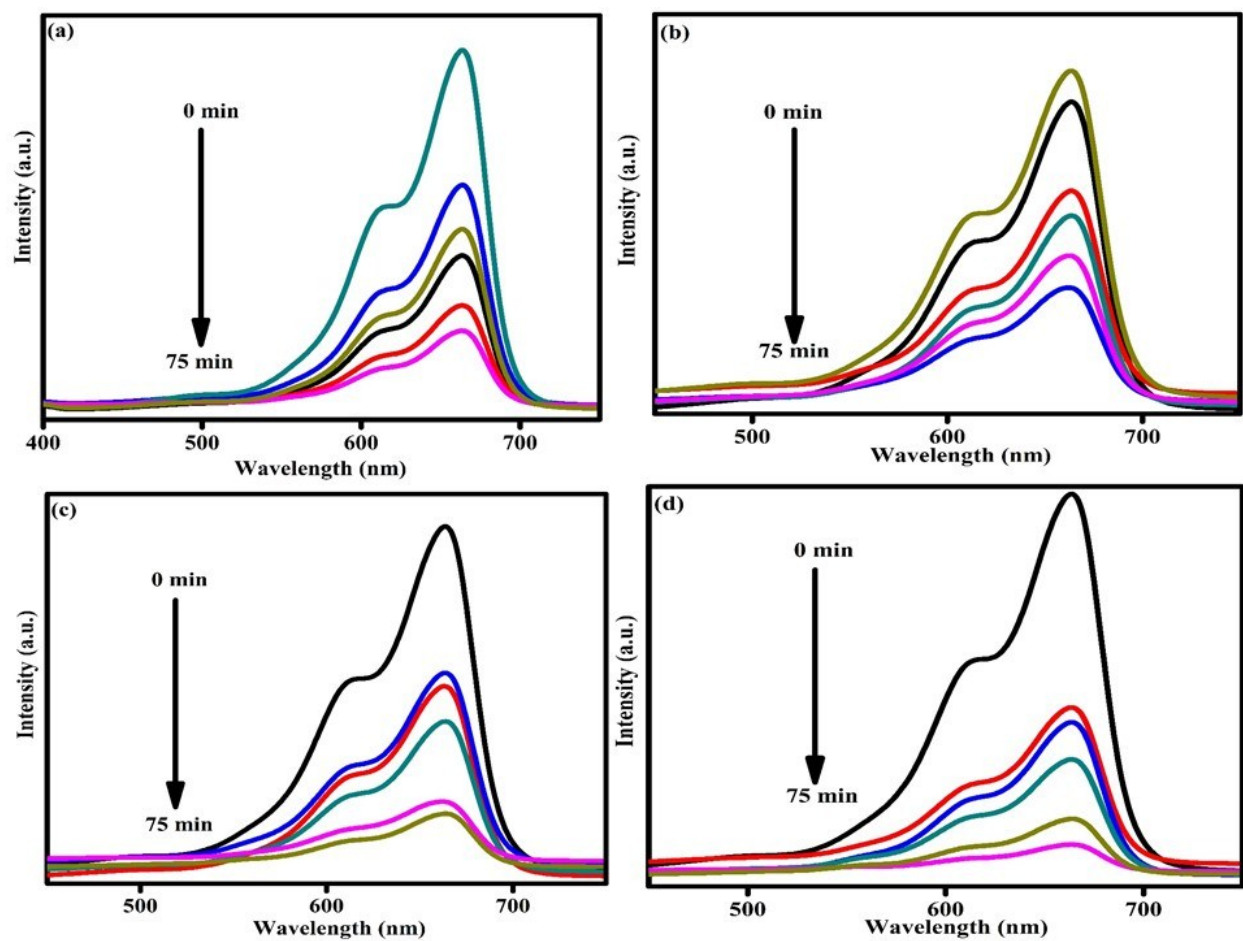

Fig (S5). Photodegradation of MB dye solution by (a)  $\text{Bi}_2\text{Zr}_2\text{O}_7$ , (b)  $\text{CuS}$ , (c)  $\text{CdCuS}$ , and (d)  $\text{Bi}_2\text{Zr}_2\text{O}_7$  supported by  $\text{CdCuS}$ .

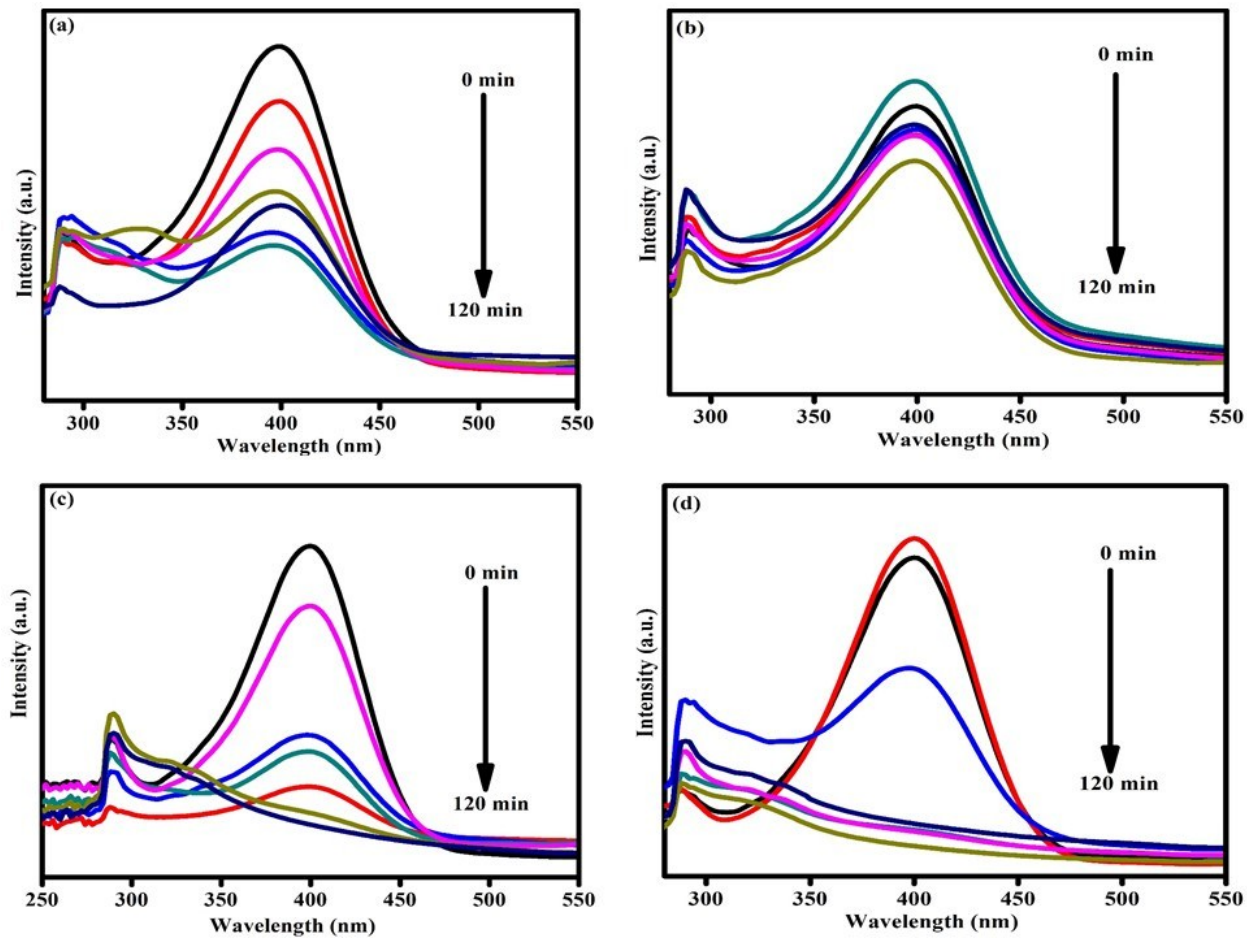

Fig (S6). Photo reduction of 4-NP solution by (a)  $\text{Bi}_2\text{Zr}_2\text{O}_7$ , (b)  $\text{CuS}$ , (c)  $\text{CdCuS}$ , and (d)  $\text{Bi}_2\text{Zr}_2\text{O}_7$  supported by  $\text{CdCuS}$ .

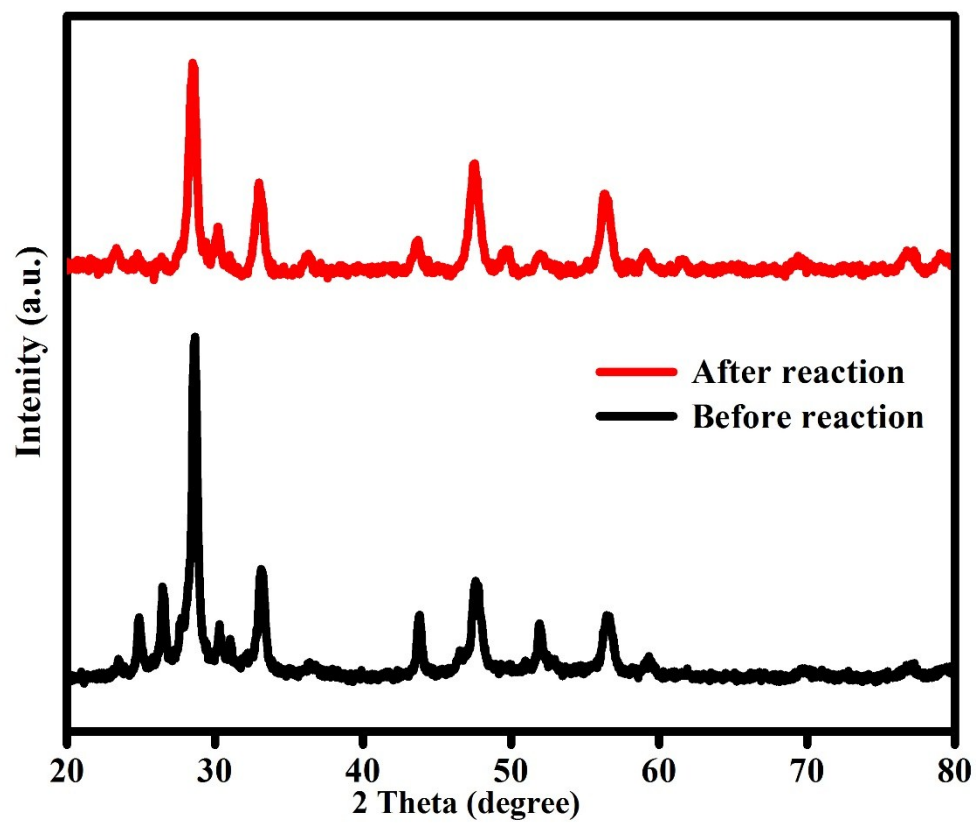

Fig (S7). Stability analysis of catalyst by XRD pattern for before and after the reaction
